# Supplementary material
Source: PubMed Central journal article supplement (PMC1326113)
Supplement: 932-938-s1.pdf [file 932-938-s1.pdf]

## Supplementary information

Supplementary table 1. Categories of knee pain with Read codes.<sup>a</sup>

| Category            | Read code          | Description                                         |
|---------------------|--------------------|-----------------------------------------------------|
| Knee injuries       | S46.. <sup>b</sup> | Dislocation/subluxation knee                        |
|                     | S54 <sup>b</sup>   | Knee sprain                                         |
|                     | S5C <sup>b</sup>   | Complete tear, knee ligament                        |
|                     | S5U2               | Rupture, patellar tendon                            |
|                     | SA100              | Open wound, knee                                    |
|                     | SE411              | Contusion, knee                                     |
|                     | SK170              | Other knee injury                                   |
| Knee arthralgia     | N0946              | Arthralgia, lower leg                               |
| Knee osteoarthritis | N05z6              | Osteoarthritis (not otherwise specified), lower leg |
| Knee (other injury) | 14G3               | History of knee problem                             |
|                     | 2H29 <sup>b</sup>  | On examination, knee joint abnormal                 |
|                     | 7K3.. <sup>b</sup> | Knee joint operations                               |
|                     | 7K6aD              | Manipulation of knee joint                          |
|                     | N0106              | Knee pyogenic arthritis                             |
|                     | N06z6              | Knee arthritis (not otherwise specified)            |
|                     | N07.. <sup>b</sup> | Internal derangement of knee                        |
|                     | N09AX              | Disorder of patella, unspecified                    |
|                     | N0966              | Knee gives way                                      |
|                     | N216 <sup>b</sup>  | Enthesopathy of knee                                |
|                     | N220z              | Synovitis of knee                                   |
|                     | N2225              | Housemaid's knee                                    |
|                     | N3241              | Kohler's disease                                    |
|                     | N3682              | Chronic instability of knee                         |

<sup>a</sup>The measure of consultation frequency is the annual period prevalence of consultations within these four categories, stratified by age, defined as the number of people in the age group who consulted at least once in the year with a Read code within the label category, divided by the total number of people within that age group registered mid-year with the practice. <sup>b</sup>Other terms lie within the given Read terms in the hierarchy, and were included in the search.
