# Supplementary material
Source: PubMed Central journal article supplement (PMC1326113)

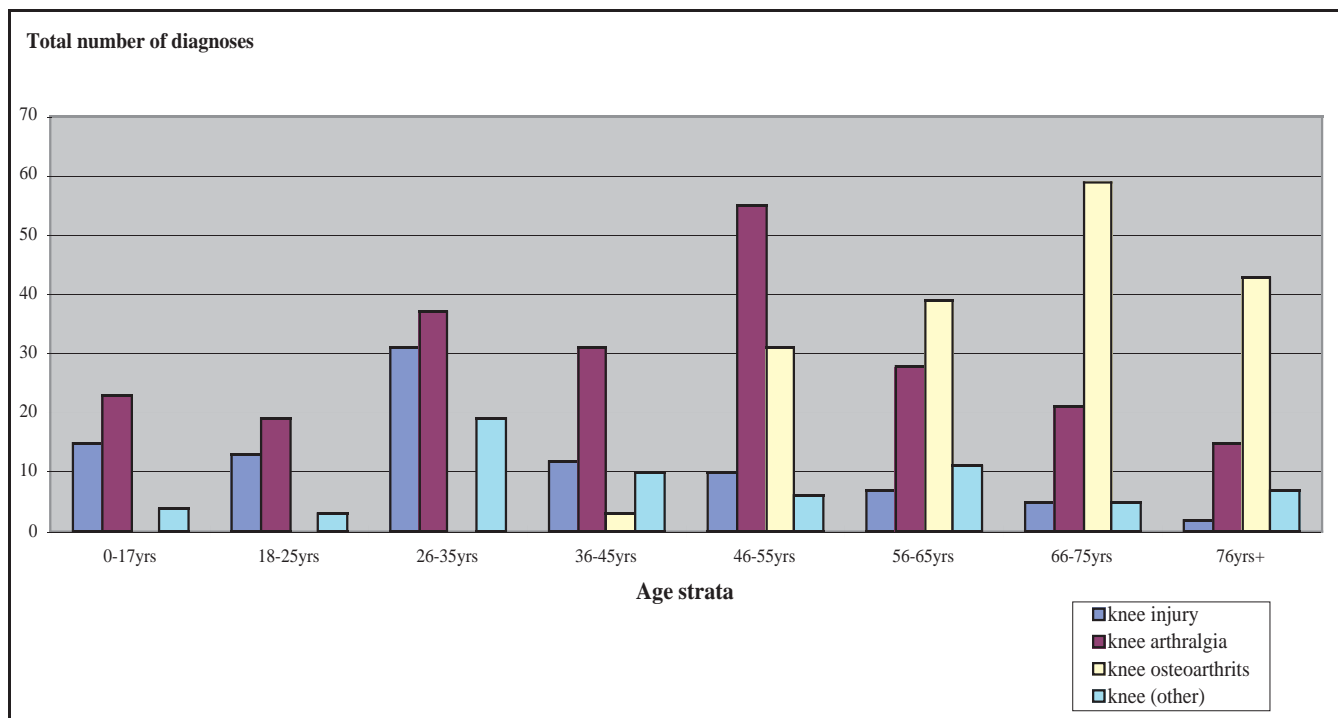

Supplementary figure 1. Knee-related diagnoses by age group.

Supplement: 932-938-s2.pdf [file 932-938-s2.pdf]
